# Supplementary material
Source: Springer Nature journal article supplement (https://www.springermedizin.de/resource/supplementary/13048_2013_225_MOESM2_ESM.pdf/9665164)

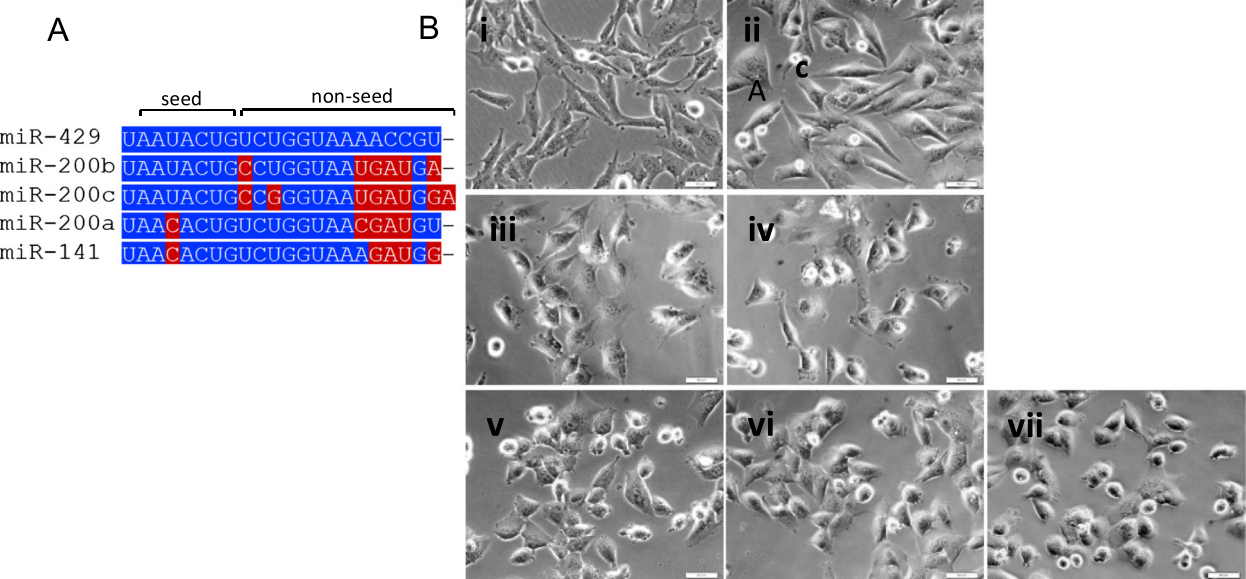

Supplement: MOESM2 [file 9665164]
